# Supplementary material
Source: PubMed Central journal article supplement (PMC6994142)
Supplement: jci-130-130730-s059.pdf [file jci-130-130730-s059.pdf]

**A**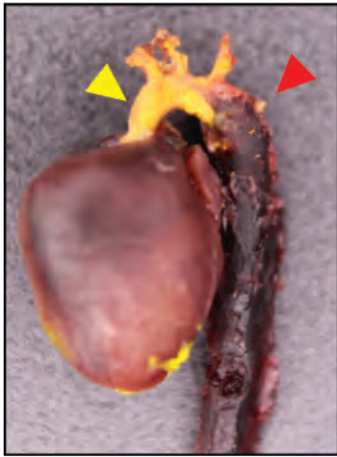**B**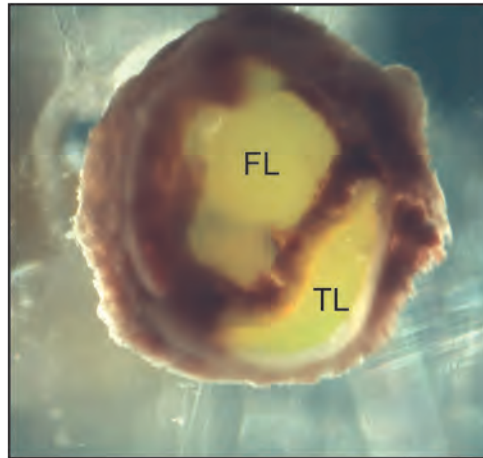**C**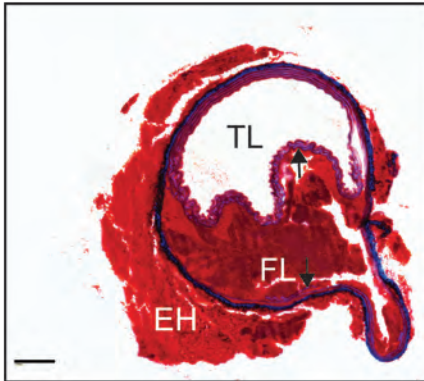**D**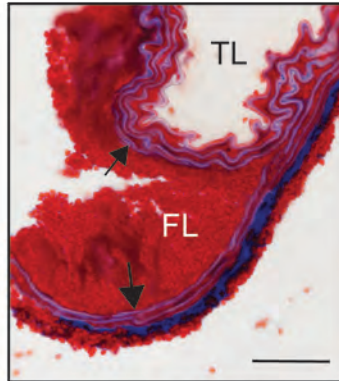**E**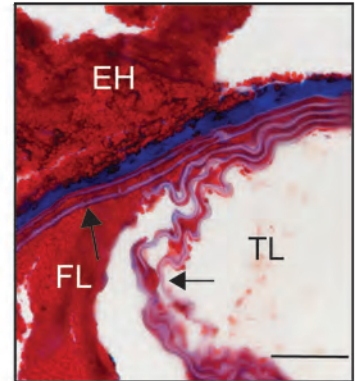

Supplementary Figure 1. vEDS mice develop spontaneous aortic rupture and dissection.

a, A representative gross post-mortem examination of a latex-injected aorta (yellow arrowhead) demonstrates descending aortic dissection (red arrowhead). b, A representative gross post-mortem examination of a latex-injected aorta in cross section from a *Col3a1*<sup>G209S/+</sup> mouse that died from a ruptured aortic dissection in the descending thoracic aorta. TL = true lumen, FL = false lumen. c, Coronal section from the aorta in (b) which demonstrates an aortic dissection in the descending thoracic aorta, with arrows pointing to elastic lamellae observed on either side of the intramural blood accumulation. TL = true lumen, FL = false lumen, EH = extravascular hemorrhage, scale bar = 100  $\mu$ m.

d, e, Higher power views showing the margins of dissection in the descending thoracic aorta, arrows point to elastic lamellae observed on either side of the intramural blood accumulation, TL = true lumen, FL = false lumen, EH = extravascular hemorrhage, scale bar = 50  $\mu$ m

**A**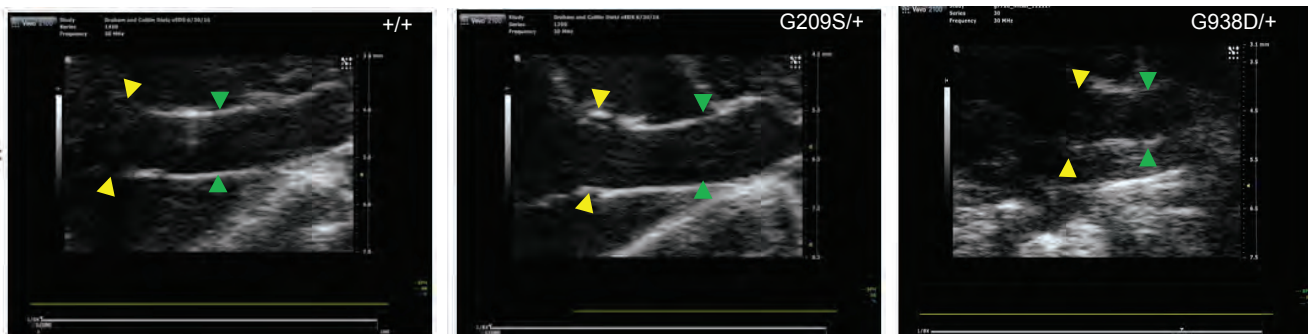**B**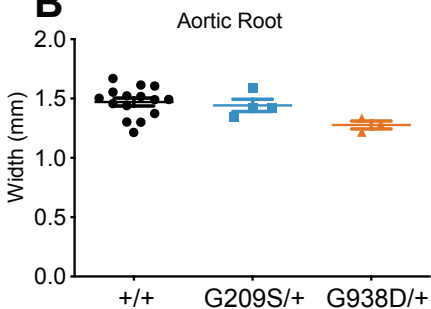**C**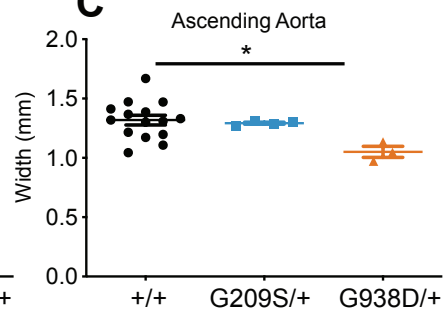**D**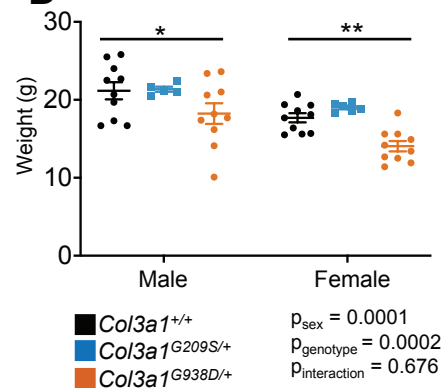

Supplementary Figure 2. vEDS mice do not have ascending aortic aneurysm.

a, Echocardiographic images of the root and ascending aorta in wild-type and vEDS mice. Yellow arrowheads point to the root and green arrowheads point to the ascending aorta. b, Measurement of aortic root diameter. Error bars show mean  $\pm$  s.e. No significant differences were found using one-way ANOVA ( $p=0.0573$ ,  $F = 3.337$ ). c, Measurement of ascending aortic diameter. Error bars show mean  $\pm$  s.e. Asterisks signify significant differences using one-way ANOVA ( $*p<0.05$ ,  $F = 4.669$ ).

d, Weights of a cohort of male and female vEDS mice at 60 days of age. Error bars show mean  $\pm$  s.e. Asterisks signify significant differences using two-way ANOVA ( $***p<0.001$ ;  $DF = 2$ ,  $F = 0.3943$  interaction;  $DF = 1$ ,  $F = 17.18$  sex;  $DF = 2$ ,  $F = 10.42$  genotype).

*Col3a1*<sup>+/+</sup>*Col3a1*<sup>G209S/+</sup>*Col3a1*<sup>G938D/+</sup>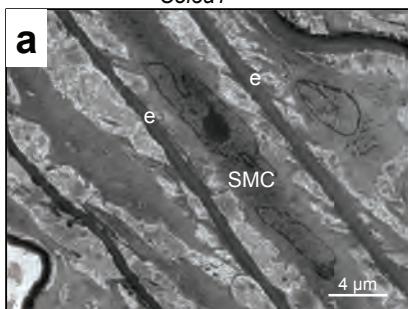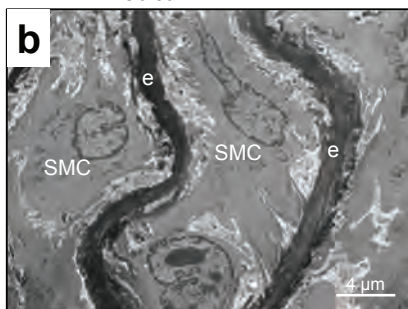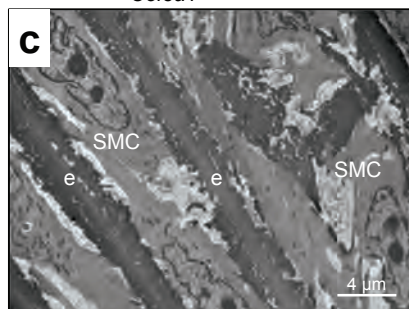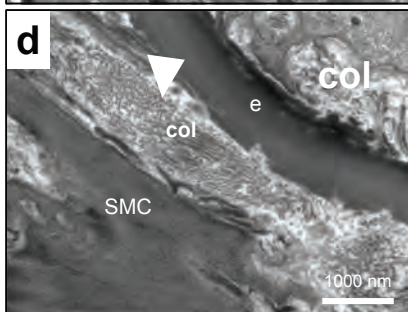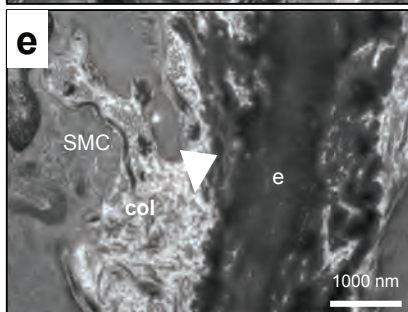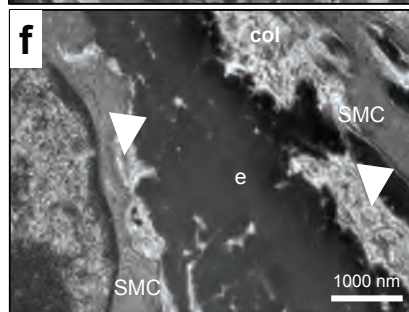*Col3a1*<sup>+/+</sup>*Col3a1*<sup>G209S/+</sup>*Col3a1*<sup>G938D/+</sup>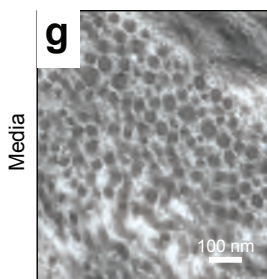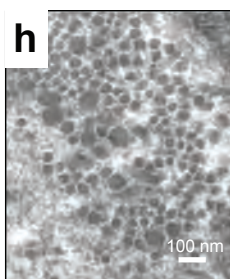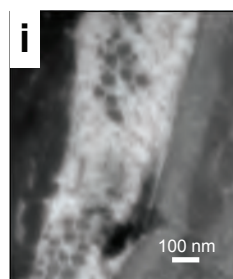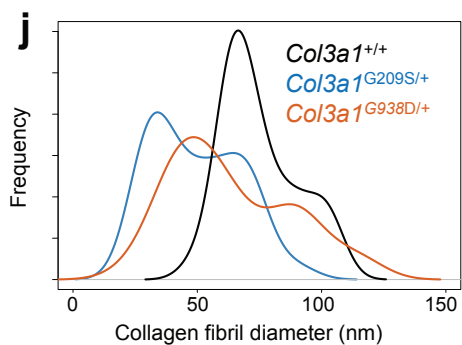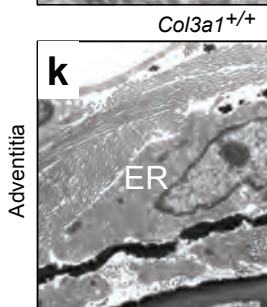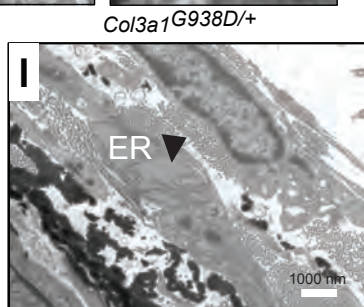

Supplementary Figure 3. vEDS aortas have abnormal extracellular matrix architecture.

a-c, electron microscopy images of the proximal descending aorta in wild-type and vEDS mice. SMC = vascular smooth muscle cell, e = elastin, col = collagen fibril. d-f, increased magnification of elastin-collagen-vascular smooth muscle cell interface in *Col3a1*<sup>+/+</sup>, *Col3a1*<sup>G209S/+</sup>, and *Col3a1*<sup>G938D/+</sup> aortas. White arrowheads indicate paucity of collagen. g-i electron microscopy images of collagen cross fiber diameter in *Col3a1*<sup>+/+</sup>, *Col3a1*<sup>G209S/+</sup>, and *Col3a1*<sup>G938D/+</sup> aortas. j, density plot demonstrating the distribution of collagen cross fiber diameters for *Col3a1*<sup>+/+</sup>, *Col3a1*<sup>G209S/+</sup>, and *Col3a1*<sup>G938D/+</sup> aortas. k,l electron microscopy images of adventitial fibroblasts in *Col3a1*<sup>+/+</sup>, *Col3a1*<sup>G209S/+</sup>, and *Col3a1*<sup>G938D/+</sup> aortas. ER = endoplasmic reticulum. Black arrowhead indicates distended ER.

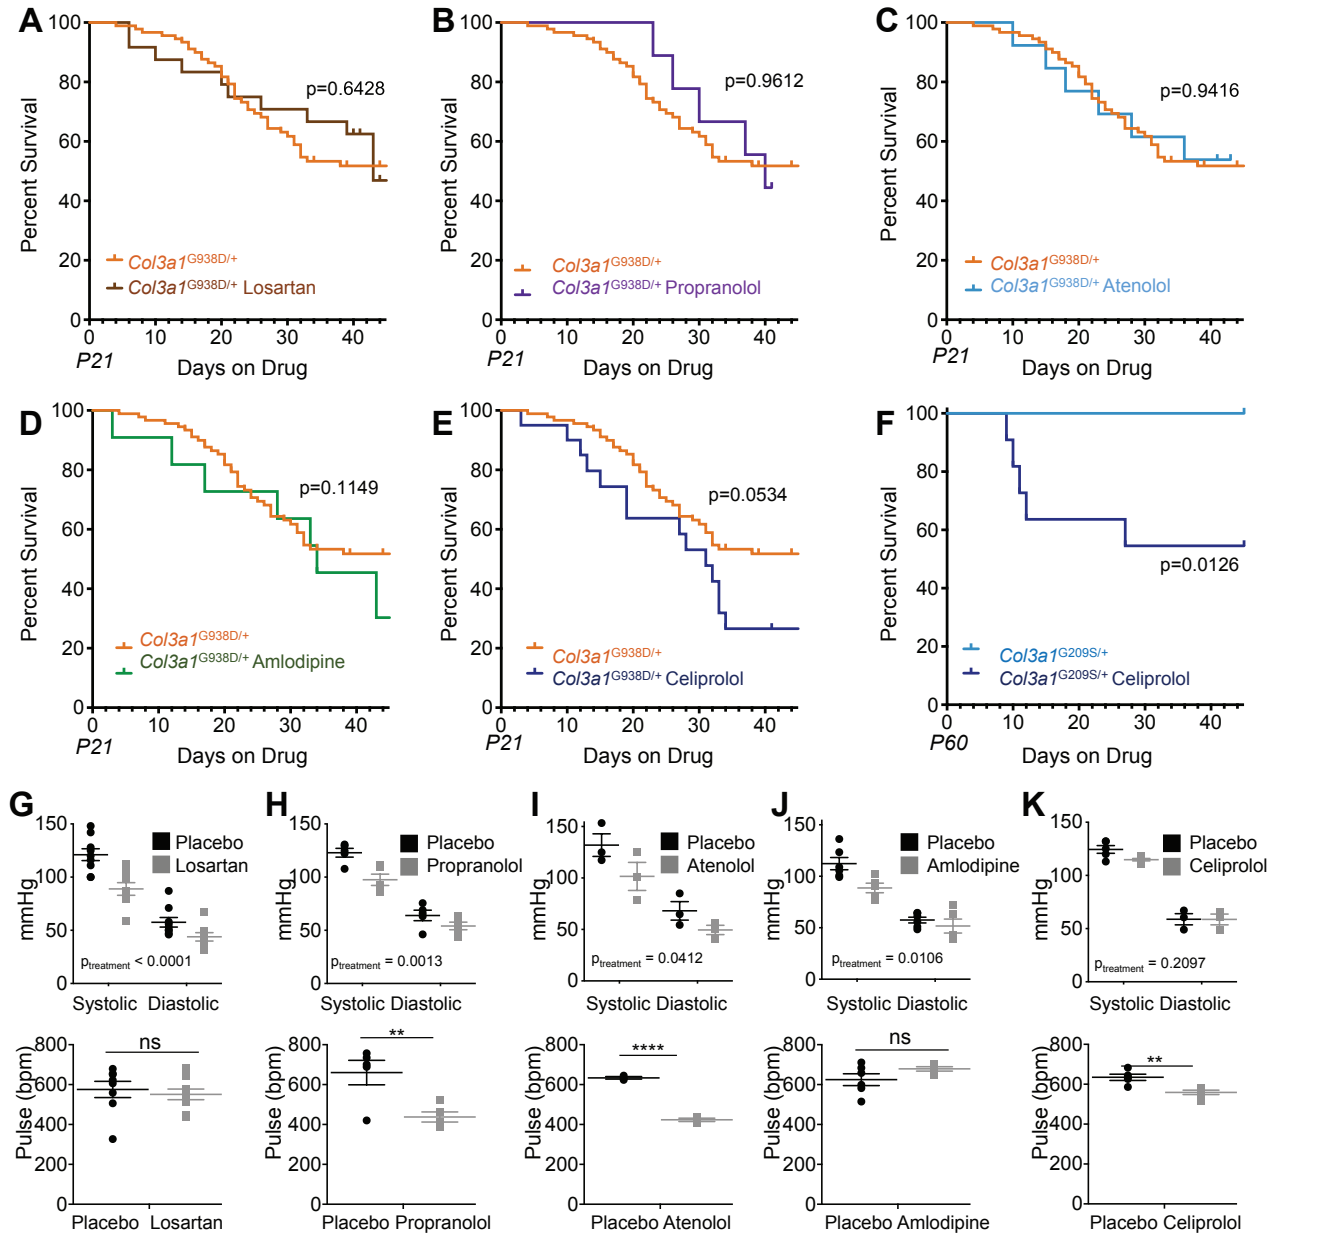

Supplementary Figure 4. Supplementary Figure 4. Losartan, propranolol, atenolol, and celiprolol do not rescue death from aortic rupture.

a, Kaplan-Meier survival curve comparing *Col3a1*<sup>G938D/+</sup> (n=93) to *Col3a1*<sup>G938D/+</sup> (n=24) mice receiving losartan. b, Kaplan-Meier survival curve comparing *Col3a1*<sup>G938D/+</sup> (n=93) to *Col3a1*<sup>G938D/+</sup> (n=9) mice receiving propranolol. c, Kaplan-Meier survival curve comparing *Col3a1*<sup>G938D/+</sup> (n=93) to *Col3a1*<sup>G938D/+</sup> (n=13) mice receiving atenolol. d, Kaplan-Meier survival curve comparing *Col3a1*<sup>G938D/+</sup> (n=93) to *Col3a1*<sup>G938D/+</sup> (n=11) mice receiving amlodipine. e, Kaplan-Meier survival curve comparing *Col3a1*<sup>G938D/+</sup> (n=93) to *Col3a1*<sup>G938D/+</sup> (n=18) mice receiving celiprolol. f, Kaplan-Meier survival curve comparing *Col3a1*<sup>G209S/+</sup> (n=12) to *Col3a1*<sup>G209S/+</sup> (n=11) mice receiving celiprolol. g, blood pressure measurements for mice on losartan. Error bars show mean  $\pm$  s.e. Asterisks signify significant differences between treatment groups (pressure: DF = 1, F=20.39, pulse: t=0.5155) h, blood pressure measurements for mice on propranolol. Error bars show mean  $\pm$  s.e. Asterisks signify significant differences between treatment groups (pressure: DF = 1, F=15.26, Mann-Whitney test for pulse rate, \*\*p<0.01). i, blood pressure measurements for mice on atenolol. Error bars show mean  $\pm$  s.e. Asterisks signify significant differences between treatment groups (pressure: DF=1, F=5.90, pulse: \*\*\*\*p<0.0001, t=20.12). j, blood pressure measurements for mice on amlodipine. Error bars show mean  $\pm$  s.e. Asterisks signify significant differences between treatment groups (pressure: DF=1, F=8.134, pulse: p=0.1511, t=1.569). k, blood pressure measurements for mice on celiprolol. Error bars show mean  $\pm$  s.e. Asterisks signify significant differences between treatment groups (pressure: DF=1, F=272.8, pulse: \*\*p<0.01, t=3.959). For all survival curves, significant differences were calculated using Log-Rank (Mantel-Cox) analysis and a universal control group with N= 93 across all drug tests that started at P21. FDR-adjusted p-values are presented in Supplementary Table 3. For all blood pressure measurements, significant differences between treatment groups were determined using two-way ANOVA and a single p-value for treatment effect on both systolic and diastolic pressure is reported. For all pulse measurements, significant differences between treatment groups were determined using Student's t-test unless otherwise noted. P21 = post-natal day 21; P60 = post-natal day 60

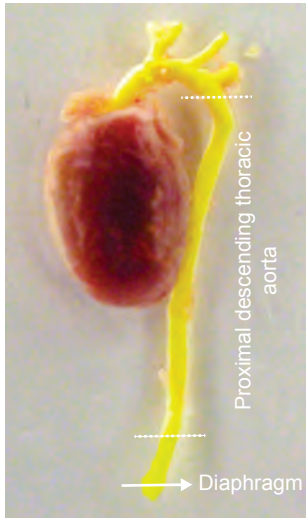

Supplemental Figure 5. Location of the aortic section in the proximal descending thoracic aorta sent for bulk RNA sequencing.

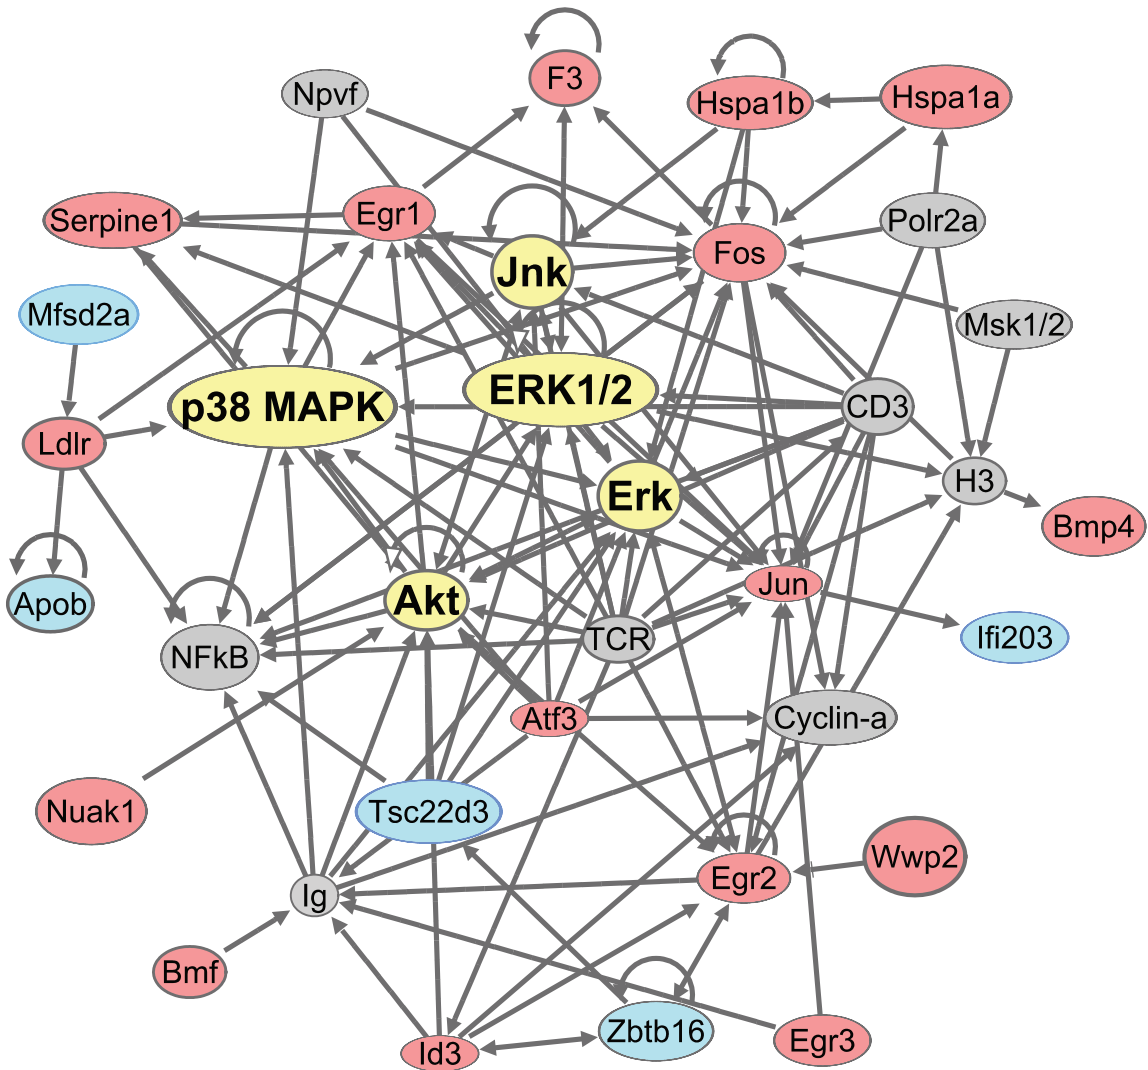

Supplementary Figure 6. Pathway analysis (Ingenuity) based on the differentially expressed genes identified by bulk RNAseq. Genes in red are upregulated and genes in blue are downregulated.

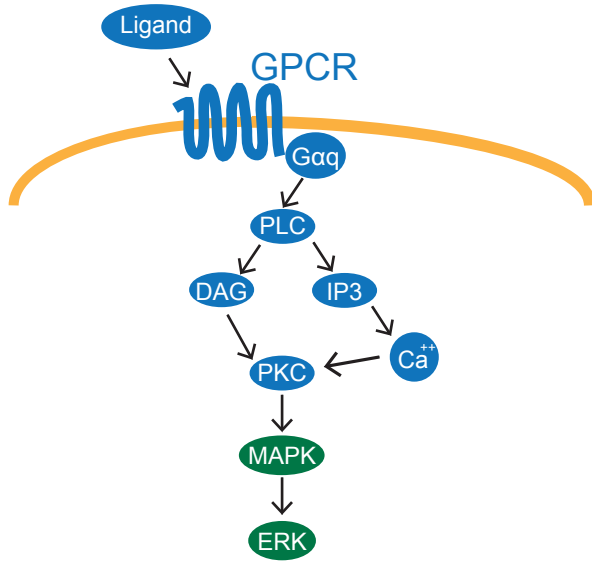

Supplementary Figure 7. Diagram illustrating proposed signaling pathway based on transcriptome profiling.

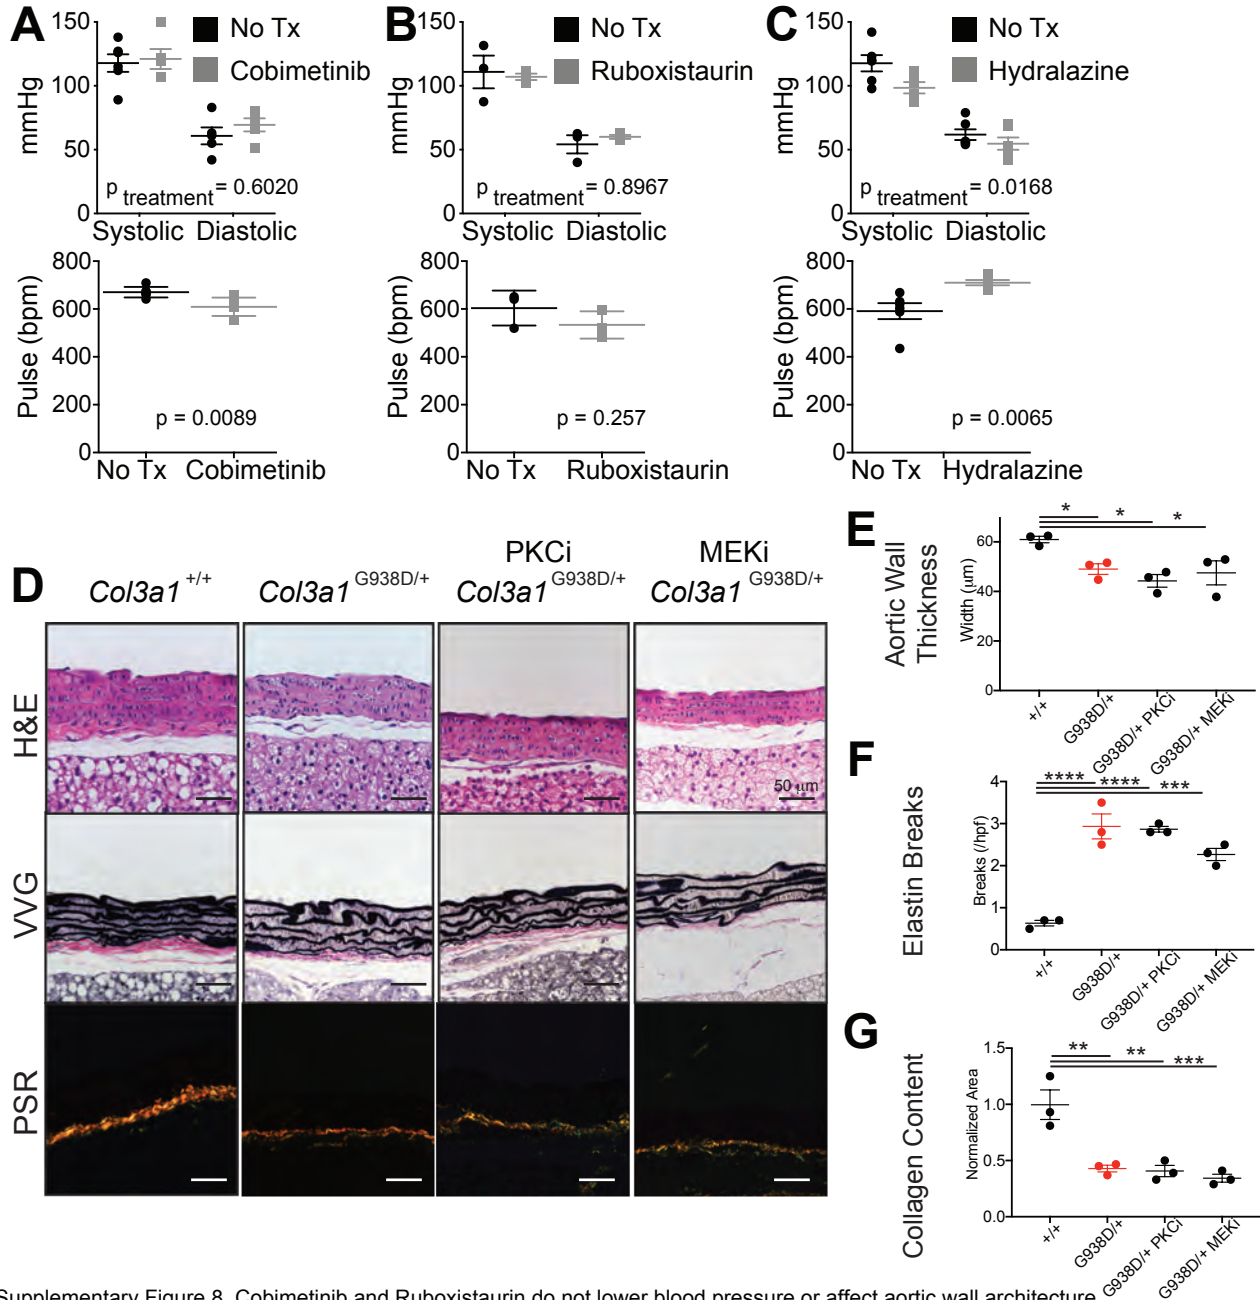

Supplementary Figure 8. Cobimetinib and Ruboxistaurin do not lower blood pressure or affect aortic wall architecture. a, blood pressure measurements for mice on cobimetinib. Error bars show mean  $\pm$  s.e. Differences between treatment groups were calculated two-way ANOVA for blood pressure and Student's t-test for pulse rate (DF=1, F=0.7523, T=3.325). b, blood pressure measurements for mice on ruboxistaurin. Error bars show mean  $\pm$  s.e. Differences between treatment groups were calculated using two-way ANOVA for blood pressure and Student's t-test for pulse rate (DF = 1, F=0.0179, T=2.488). c, blood pressure measurements for mice on hydralazine. Error bars show mean  $\pm$  s.e. Differences between treatment groups were calculated using two-way ANOVA for blood pressure and Student's t-test for pulse rate (DF = 1, F=6.810, T=3.421). d, Histological staining (H&E = Hematoxylin & Eosin, VVG = Verhoeff Van Gieson, and PSR = Picrosirius Red) of wild type and vEDS aortic cross sections treated with ruboxistaurin (PKCi) or cobimetinib (MEKi). Scale bar = 50  $\mu\text{m}$ . e, Quantification of aortic wall thickness in aortic cross sections. Error bars show mean  $\pm$  s.e. Asterisks signify significant differences using one-way ANOVA with Dunnett's multiple comparisons post-hoc test (\* $p < 0.05$ , DF = 3, F=5.839). f, Quantification of elastin breaks in aortic cross sections. Error bars show mean  $\pm$  s.e. Asterisks signify significant differences using one-way ANOVA with Dunn's multiple comparisons post-hoc test (\*\*\*\* $p < 0.0001$ , \*\*\*\* $p < 0.0001$ , DF = 3, F=38.93). g, Quantification of collagen content in aortic cross sections, as measured by normalized PSR intensity. Error bars show mean  $\pm$  s.e. Asterisks signify significant differences using one-way ANOVA with Dunnett's multiple comparisons post-hoc test (\*\* $p < 0.01$ , \*\*\* $p < 0.001$ , DF = 3, F=16.91).



**A**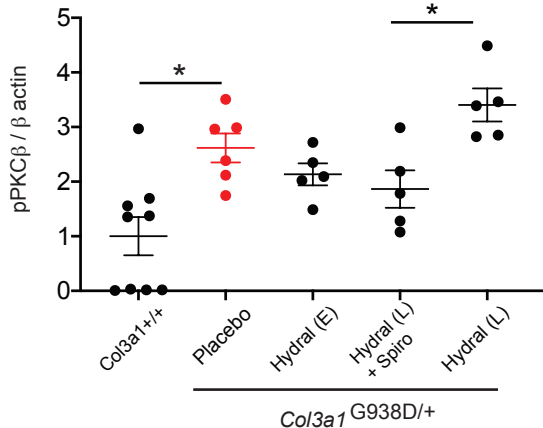**B**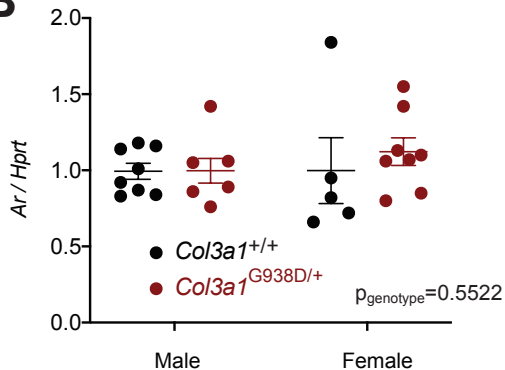

Supplementary Figure 9. Androgen signaling cross talks with PLC/IP3/PKC/ERK pathway.

a, quantification of pPKC $\beta$  levels normalized to  $\beta$ -actin loading control for aortas for *Col3a1*<sup>+/+</sup> (n=9), *Col3a1*<sup>G938D/+</sup> (n=6), *Col3a1*<sup>G938D/+</sup> mice on hydralazine sampled at age P40 (Hydral (E), n=5), *Col3a1*<sup>G938D/+</sup> mice on hydralazine and spironolactone sampled at age P70 (Hydral (L)+Spiro, n=5), and *Col3a1*<sup>G938D/+</sup> on hydralazine sampled at age P70 (Hydral (L), n=5) proximal descending aortas. Error bars show mean  $\pm$  s.e. Asterisks signify significant differences using one-way ANOVA with Dunnett's multiple comparisons post-hoc test (\*\*p<0.01, \*p<0.05, DF = 4, F = 8.349). b, qPCR analysis of Ar normalized to Hprt in the proximal descending aorta comparing wild-type to *Col3a1*<sup>G938D/+</sup> for both male and female. Error bars show mean  $\pm$  s.e. Significant differences were determined using two-way ANOVA (DF = 1, F = 0.3635)

**A**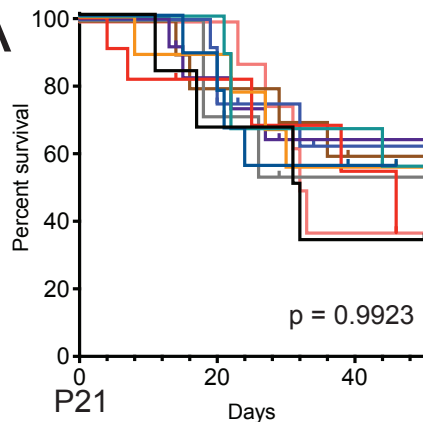

- *Col3a1*<sup>G938D/+</sup> Cohort 1
- *Col3a1*<sup>G938D/+</sup> Cohort 2
- *Col3a1*<sup>G938D/+</sup> Cohort 3
- *Col3a1*<sup>G938D/+</sup> Cohort 4
- *Col3a1*<sup>G938D/+</sup> Cohort 5
- *Col3a1*<sup>G938D/+</sup> Cohort 6
- *Col3a1*<sup>G938D/+</sup> Cohort 7
- *Col3a1*<sup>G938D/+</sup> Cohort 8
- *Col3a1*<sup>G938D/+</sup> Cohort 9
- *Col3a1*<sup>G938D/+</sup> Cohort 10

Supplementary Figure 10. Independent cohorts of untreated *Col3a1*<sup>G938D/+</sup> mice perform consistently over time. The p-value represents a test of whether any group differences occurred using Log-rank (Mantel-Cox) analysis. a, Control cohorts followed from P21; cohort 1: n=9, cohort 2: n=9, cohort 3: n=9, cohort 4: n=11, cohort 5: n=12, cohort 6: n=12, cohort 7: n=7, cohort 8: n=10, cohort 9: n=8, cohort 10: n=6. b, Control cohorts followed from P0; cohort 11: n=13, cohort 12: n=12, cohort 13: n=12, cohort 14: n=14. P21 = post-natal day 21; P0 = post-natal day 0. c, Control cohorts followed postpartum; cohort 1: n=7; cohort 2: n=7; cohort 3, n=8.

**B**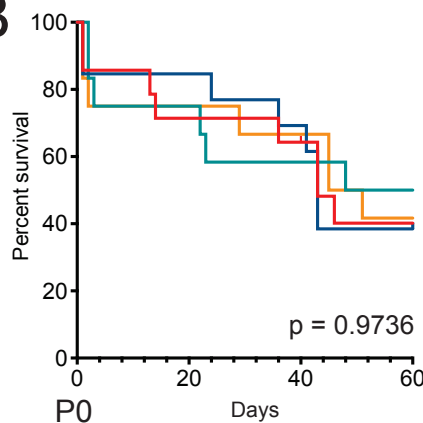

- *Col3a1*<sup>G938D/+</sup> Cohort 11
- *Col3a1*<sup>G938D/+</sup> Cohort 12
- *Col3a1*<sup>G938D/+</sup> Cohort 13
- *Col3a1*<sup>G938D/+</sup> Cohort 14

**C**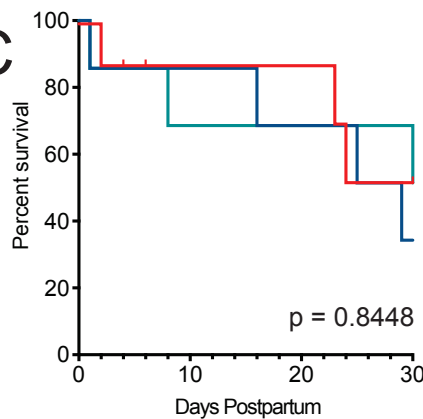

- *Col3a1*<sup>G209S/+</sup> Pregnancy Cohort 1
- *Col3a1*<sup>G209S/+</sup> Pregnancy Cohort 2
- *Col3a1*<sup>G209S/+</sup> Pregnancy Cohort 3

Tables

Supplementary Table 1. List of primers and oligonucleotide sequences.

|                                    |                                                                                                                                                                                                                                                                                                                                                           |
|------------------------------------|-----------------------------------------------------------------------------------------------------------------------------------------------------------------------------------------------------------------------------------------------------------------------------------------------------------------------------------------------------------|
| <i>Col3a1</i> G209S Forward Primer | TTTACATTCCAGGGTCCACCAG                                                                                                                                                                                                                                                                                                                                    |
| <i>Col3a1</i> G209S Reverse Primer | GTCAGGAATCTCTAAAGTTCACCTC                                                                                                                                                                                                                                                                                                                                 |
| <i>Col3a1</i> G938D Forward Primer | TCCTGGTCCTCCTGGCAATA                                                                                                                                                                                                                                                                                                                                      |
| <i>Col3a1</i> G938D Reverse Primer | TCAGATGCAAGGTGACTATGCT                                                                                                                                                                                                                                                                                                                                    |
| gRNA 1 for Exon 7                  | CCTGGTGAACCTGGTCAAGC                                                                                                                                                                                                                                                                                                                                      |
| gRNA 2 for Exon 7                  | CCAGGGGGACCTTGGTATC                                                                                                                                                                                                                                                                                                                                       |
| gRNA 1 for Exon 39                 | AGTGGTGCTCCTGGCAAGGA                                                                                                                                                                                                                                                                                                                                      |
| gRNA 2 for Exon 39                 | ACAGCAATAGCTCTCACCGG                                                                                                                                                                                                                                                                                                                                      |
| HDR Template for Exon 7            | TATATTTACACTATTCTTCTATTTTAGGGTTCTCCTGG<br>ATACCAAGGTCCCCCTGGTGAACCTGGTCAAGCTTC<br>TCCAGCAGTAAGTAACACTTGAGAATTGCTAAACACA<br>TTG                                                                                                                                                                                                                            |
| HDR Template for Exon 39 (1)       | GGCAAGGAAAGCAAAAAGACCCTTTTCTGCCATGTTA<br>AAATTTAAATTATTTGCAGGGTAATCCAGGGCCCCCA<br>GGACCCAGTGGTGCTCCTGGCAAGGACGGCCCTCC<br>AGGTCCTGCAGGCAACAGTGGTTCTCCTGGCAACCC<br>TGGAATAGCTGGACCAAAGGTGATGCTGGACAGCC<br>TGGAGAGAAGGGGCCACCTGGTGCTCAG(G/A)TCCT<br>CCGGTGAGAGCTATTGCTGTTTTGTTGGTAGACTGC<br>ATATTCTGATAACAAACATAATAAGGGAGCTAGGATT<br>CTGTAGCCATAGGCTGATTCTTT |
| HDR Template for Exon 39 (2)       | TCCTGCAGGCAACAGTGGTTCTCCTGGCAACCCTGG<br>AATAGCTGGACCAAAGGTGATGCTGGACAGCCTGG<br>AGAGAAGGGGCCACCTGGTGCTCAG(G/A)TCCTCCG<br>GTGAGAGCTATTGCTGTTTTGTTGGTAGACTGCATAT<br>TCTGATAACAAACATAATAAGGGAGCTAGGATTCTGT<br>AGCCATAGGCTGATTCTTTC                                                                                                                            |

Supplementary Table 2. Number of male and female mice utilized in each drug trial and survival differences based on sex.

|                              | p-value between Male and Female survival curves | Adjusted p-value (FDR) | # Male | # Female |
|------------------------------|-------------------------------------------------|------------------------|--------|----------|
| Untreated (starting at P0)   | 0.7893                                          | 0.9999                 | 27     | 24       |
| Untreated (starting at P21)  | 0.3496                                          | 0.6554                 | 41     | 52       |
| Losartan                     | 0.3529                                          | 0.6554                 | 9      | 15       |
| Propranolol                  | 0.0341                                          | 0.2217                 | 4      | 5        |
| Celiprolol                   | 0.2978                                          | 0.6554                 | 8      | 10       |
| Atenolol                     | 0.5773                                          | 0.8338                 | 7      | 6        |
| Amlodipine                   | 0.0871                                          | 0.3774                 | 6      | 5        |
| Ruboxistaurin                | 0.2568                                          | 0.6554                 | 7      | 9        |
| Cobimetinib                  | 0.4795                                          | 0.7792                 | 10     | 10       |
| Hydralazine                  | 0.0005                                          | 0.0065                 | 18     | 23       |
| Hydralazine + Spironolactone | 0.9999                                          | 0.9999                 | 6      | 10       |
| Bicalutamide                 | 0.9677                                          | 0.9999                 | 12     | 8        |
| Celiprolol (G209S)           | 0.9268                                          | 0.9999                 | 4      | 7        |

Supplementary Table 3. FDR-adjusted p-values for survival trials.

|                                         | Unadjusted p-value | Adjusted p-value (FDR) |
|-----------------------------------------|--------------------|------------------------|
| Losartan                                | 0.6428             | 0.8264                 |
| Propranolol                             | 0.9612             | 0.9612                 |
| Celiprolol                              | 0.0534             | 0.0961                 |
| Atenolol                                | 0.9416             | 0.9612                 |
| Amlodipine                              | 0.1149             | 0.1723                 |
| Ruboxistaurin                           | 0.0057             | 0.0171                 |
| Cobimetinib                             | 0.0054             | 0.0171                 |
| Hydralazine +<br>Spironolactone         | <0.0001            | 0.0001                 |
| Bicalutamide                            | 0.0222             | 0.0500                 |
| Hydralazine (Females)                   | 0.0005             | 0.0010                 |
| Hydralazine + Bicalutamide<br>(Females) | 0.0385             | 0.0386                 |
| Hydralazine (Males)                     | 0.1478             | 0.1478                 |
| Hydralazine + Bicalutamide<br>(Males)   | 0.0001             | 0.0002                 |
| Pregnancy                               | 0.0001             | 0.0006                 |
| Pregnancy + Pups<br>Removed             | 0.0021             | 0.0031                 |
| Pregnancy + OTA                         | 0.0314             | 0.0376                 |
| Pregnancy + Trametinib                  | 0.0013             | 0.0026                 |
| Pregnancy + Hydralazine                 | 0.0003             | 0.0009                 |
| Pregnancy + Propranolol                 | 0.8838             | 0.8838                 |

Supplementary Table 4. Assessment for influence of drugs on the survival of wild-type mice

| Starting at P21              | n   | Unadjusted p-value | Adjusted p-value (FDR) |
|------------------------------|-----|--------------------|------------------------|
| Untreated                    | 129 | N/A                | N/A                    |
| Losartan                     | 23  | 0.6576             | 0.7768                 |
| Propranolol                  | 9   | 0.7768             | 0.7768                 |
| Celiprolol                   | 11  | 0.7651             | 0.7768                 |
| Atenolol                     | 15  | 0.7144             | 0.7768                 |
| Amlodipine                   | 19  | 0.1283             | 0.7768                 |
| Ruboxistaurin                | 18  | 0.6885             | 0.7768                 |
| Cobimetinib                  | 11  | 0.7540             | 0.7768                 |
| Hydralazine + Spironolactone | 16  | 0.7055             | 0.7768                 |
| Bicalutamide                 | 32  | 0.5930             | 0.7768                 |

| Starting at P0 | n  | Unadjusted p-value | Adjusted p-value (FDR) |
|----------------|----|--------------------|------------------------|
| Untreated      | 78 | N/A                | N/A                    |
| Hydralazine    | 48 | 0.2369             | N/A                    |
